# Supplementary material for: Novel Pyoverdine Inhibitors Mitigate Pseudomonas aeruginosa Pathogenesis
Source: PubMed Central journal article supplement (PMC6333909; doi:10.3389/fmicb.2018.03317), 2019-01-09
Supplement: Data_Sheet_1.pdf [file Data_Sheet_1.pdf]

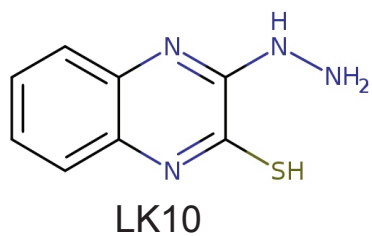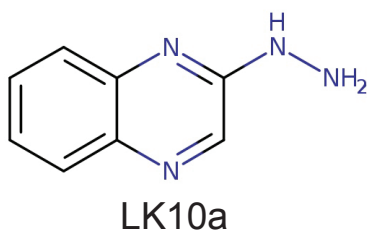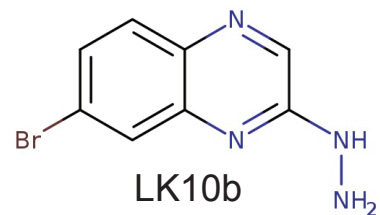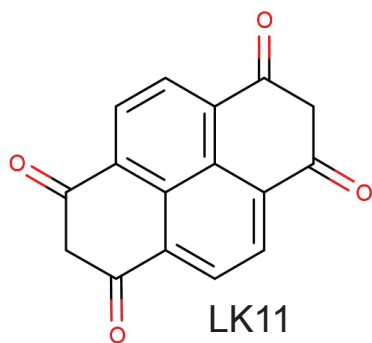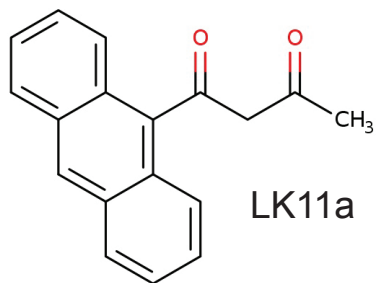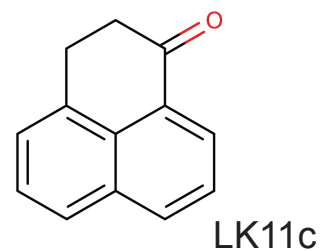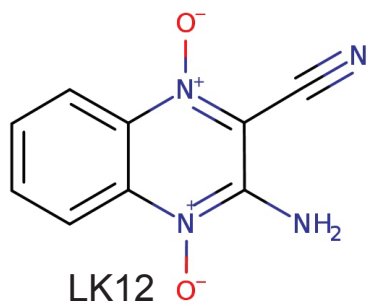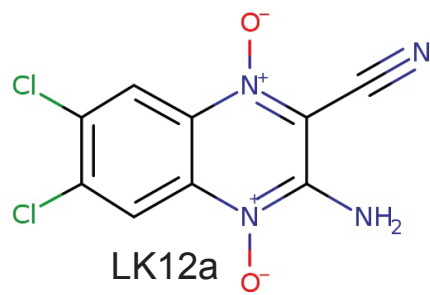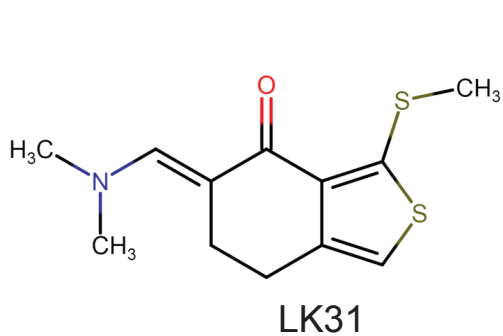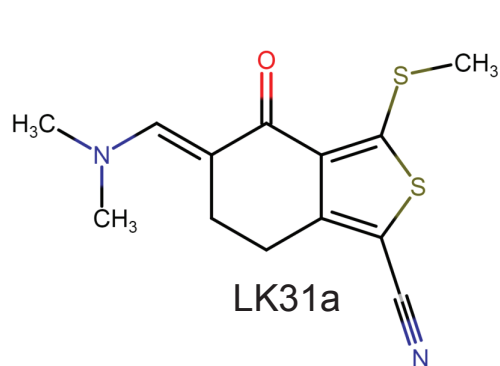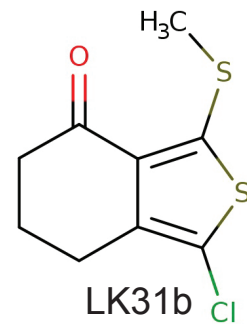

Figure S1. Structures of pyoverdine inhibitors and their analogs.

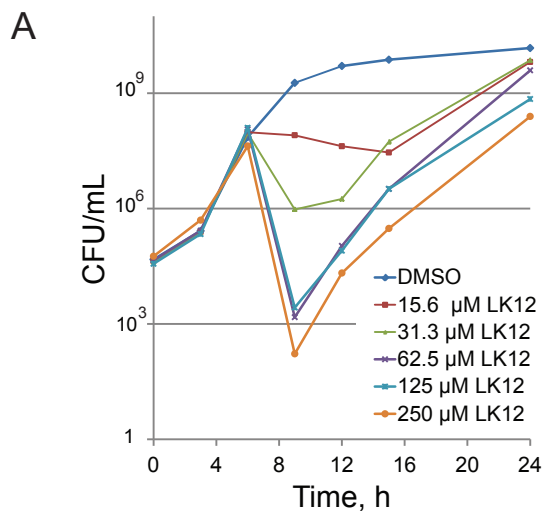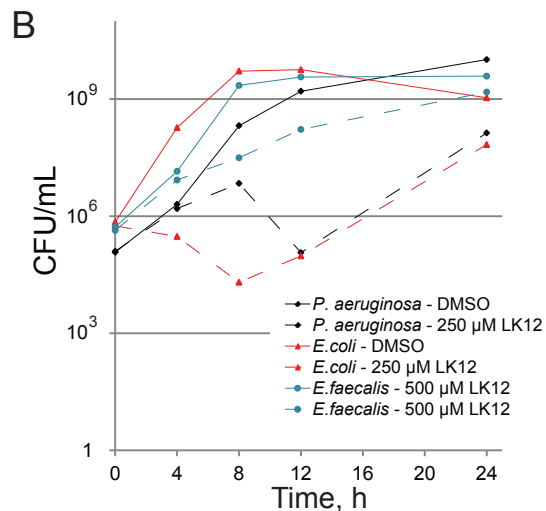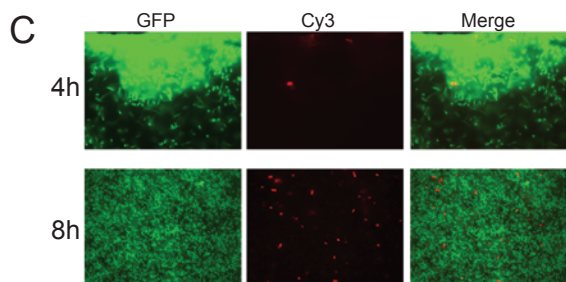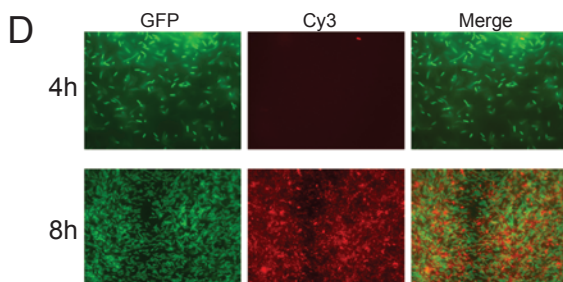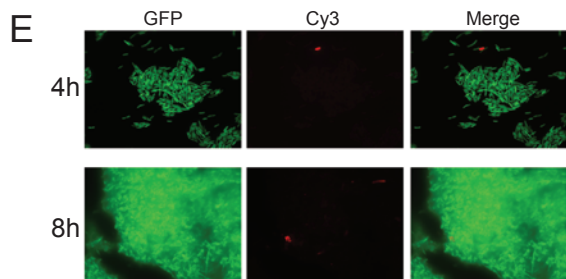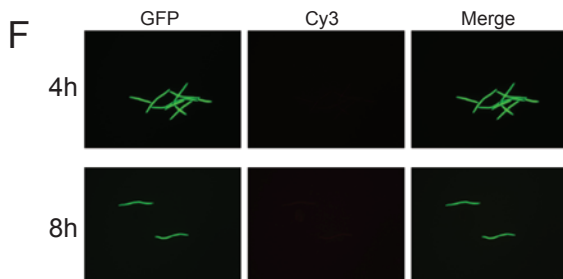

**Figure S2. LK12 possesses antibacterial properties.** (A) Growth curves of *P. aeruginosa* strain PA14 inoculated in LB in the presence of varying concentrations of LK12. (B) Effect of LK12 on growth of the gram negative bacteria *P. aeruginosa* and *Escherichia coli* or the gram positive pathogen *Enterococcus faecalis*. (C-F) Fluorescence microscopy of *P. aeruginosa* strain PA14-GFP (C, D) or *E. coli* (E, F) in the presence of DMSO (C, E) or 250  $\mu$ M LK12 (D, F). In C-F dead cells were stained using the cell-impermeant dye propidium iodide. Leftmost panels in C-F illustrate bacterial GFP fluorescence, middle images are the Cy3 channel showing propidium iodide staining, and rightmost panels show merged fluorescence. At least three biological replicates were performed for each experiment.

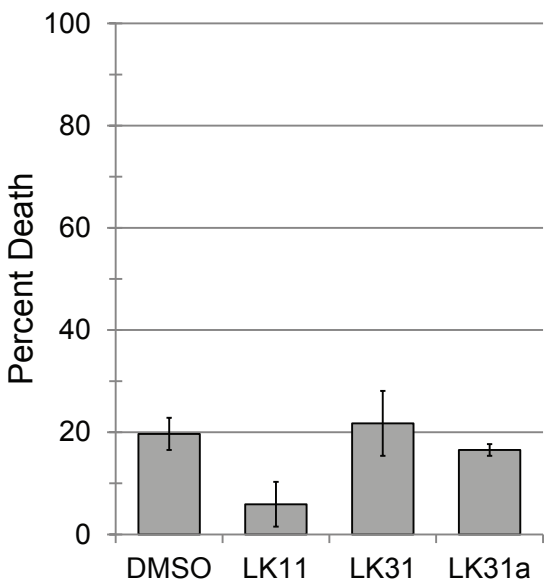

**Figure S3. LK11, LK31, and LK31a do not cause overt host toxicity.** *C. elegans* incubated for 7 days with DMSO or with 128  $\mu$ M of LK11, LK31, or LK31a, and then stained with Sytox Orange, as per usual for Liquid Killing.

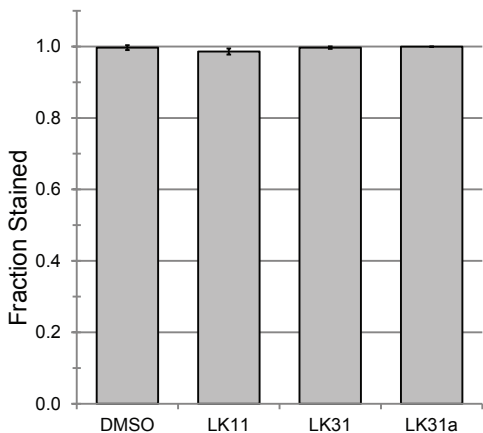

**Figure S4. LK11, LK31, and LK31a do not interfere with Sytox Orange staining.** Fluorescence of heat-killed *C. elegans*, incubated with 250  $\mu$ M LK11, LK31, or LK31a for 8h prior to staining with Sytox Orange. 1 on Y axis corresponds to 100% of *C. elegans* staining, as expected for dead worms.

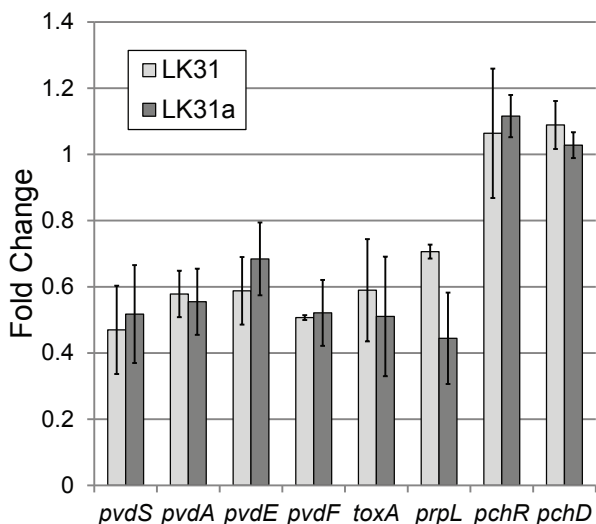

**Figure S5. Expression of pyoverdine-dependent genes in the presence of LK31 and LK31a.** qRT-PCR showing expression of a panel of known pyoverdine target genes and *pchD* and *pchR* in *P. aeruginosa* grown in the presence of DMSO or LK31, or LK31a (100  $\mu$ M). Three biological replicates were performed.
