# Supplementary material for: Novel Pyoverdine Inhibitors Mitigate Pseudomonas aeruginosa Pathogenesis
Source: PubMed Central journal article supplement (PMC6333909; doi:10.3389/fmicb.2018.03317), 2019-01-09
Supplement: Data_Sheet_2.pdf [file Data_Sheet_2.pdf]

**Table S1. Table of major small molecule libraries screened for the ability to alleviate *C. elegans* killing by *P. aeruginosa*.**

| <b>Library Name</b>              | <b>Cpds Screened</b> |
|----------------------------------|----------------------|
| Prestwick 1 Collection           | 1020                 |
| Microsource - US Drug Collection | 1020                 |
| LOPAC                            | 1360                 |
| NINDS Custom Collection          | 1360                 |
| Life Chemicals                   | 3872                 |
| Maybridge                        | 6516                 |
| ChemBridge                       | 10208                |
| Asinex                           | 12320                |
| ChemDiv                          | 14080                |
| Enamine                          | 24640                |

**Table S2. Dissociation constants for LK11, LK31, LK31a and pyoverdine.**

|       | K <sub>d</sub> , $\mu$ M |
|-------|--------------------------|
| LK11  | 47                       |
| LK31  | 220                      |
| LK31a | 104                      |
